# Supplementary material for: Localization of Pyranose 2-Oxidase from Kitasatospora aureofaciens: A Step Closer to Elucidate a Biological Role
Source: MDPI journal article supplement (doi:10.3390/ijms24031975), 2023-01-19
Supplement: s1 [file s1]

## Supplementary Material

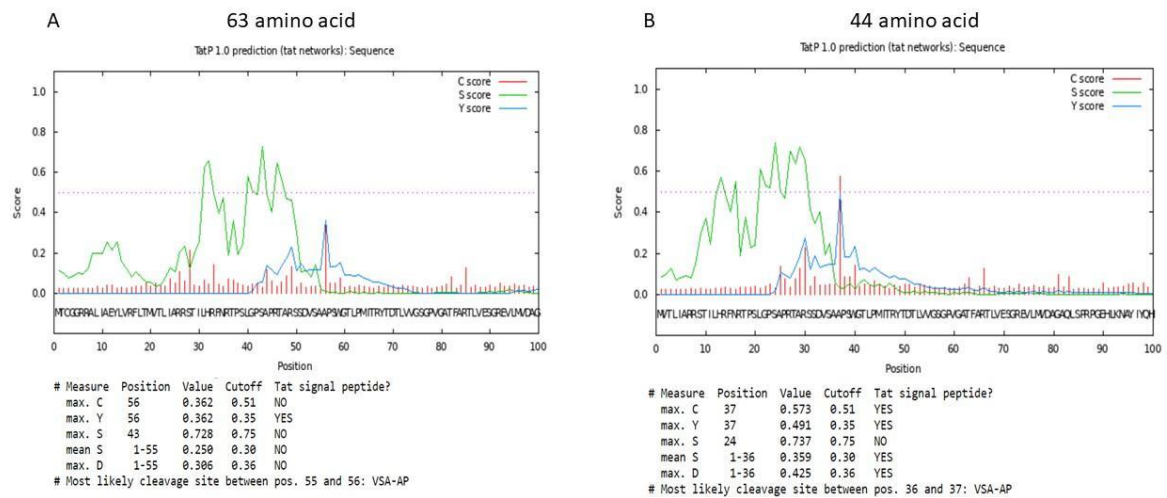

Figure S1: Signal peptide prediction using TatP-1.0 for the additional upstream 63 amino acids (A) and 44 amino acids (B)

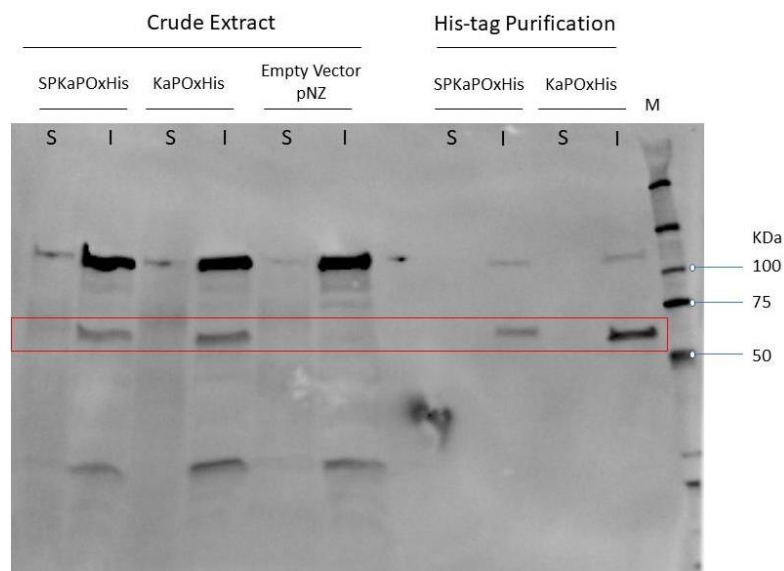

Figure S2: Western blot of samples from *B. subtilis* expression system harbouring SPKaPOxHis, KaPOxHis, and the empty pNZ vector in un-purified form (crude extract) and purified form (His-tag purification). Samples from supernatant are indicated as S, samples from the cell extract are indicated as I, the western blot marker is marked as M. Expected molecular weight of targeted protein was 60 KDa (shown in red box).

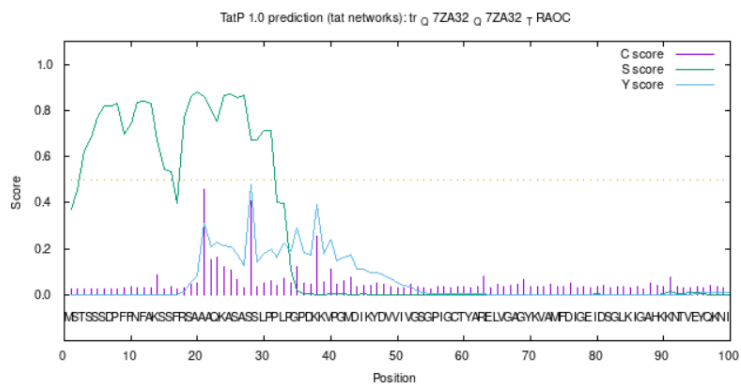

# data

```
>tr_Q7ZA32_Q7ZA32_TRA length = 100
# Measure Position Value Cutoff Tat signal peptide?
max. C 21 0.456 0.51 NO
max. Y 28 0.480 0.35 YES
max. S 20 0.883 0.75 YES
mean S 1-27 0.735 0.30 YES
max. D 1-27 0.607 0.36 YES
# Most likely cleavage site between pos. 27 and 28: ASA-SS
# Potential Tat signal peptide but No Tat motif was found
# Used regex: RR.[FGAVML][LITMVF]
//
```

Figure S3: Signal peptide prediction using TatP-1.0 for Pyranose Oxidase from *Trametes ochracea* (POx Q7ZA32)

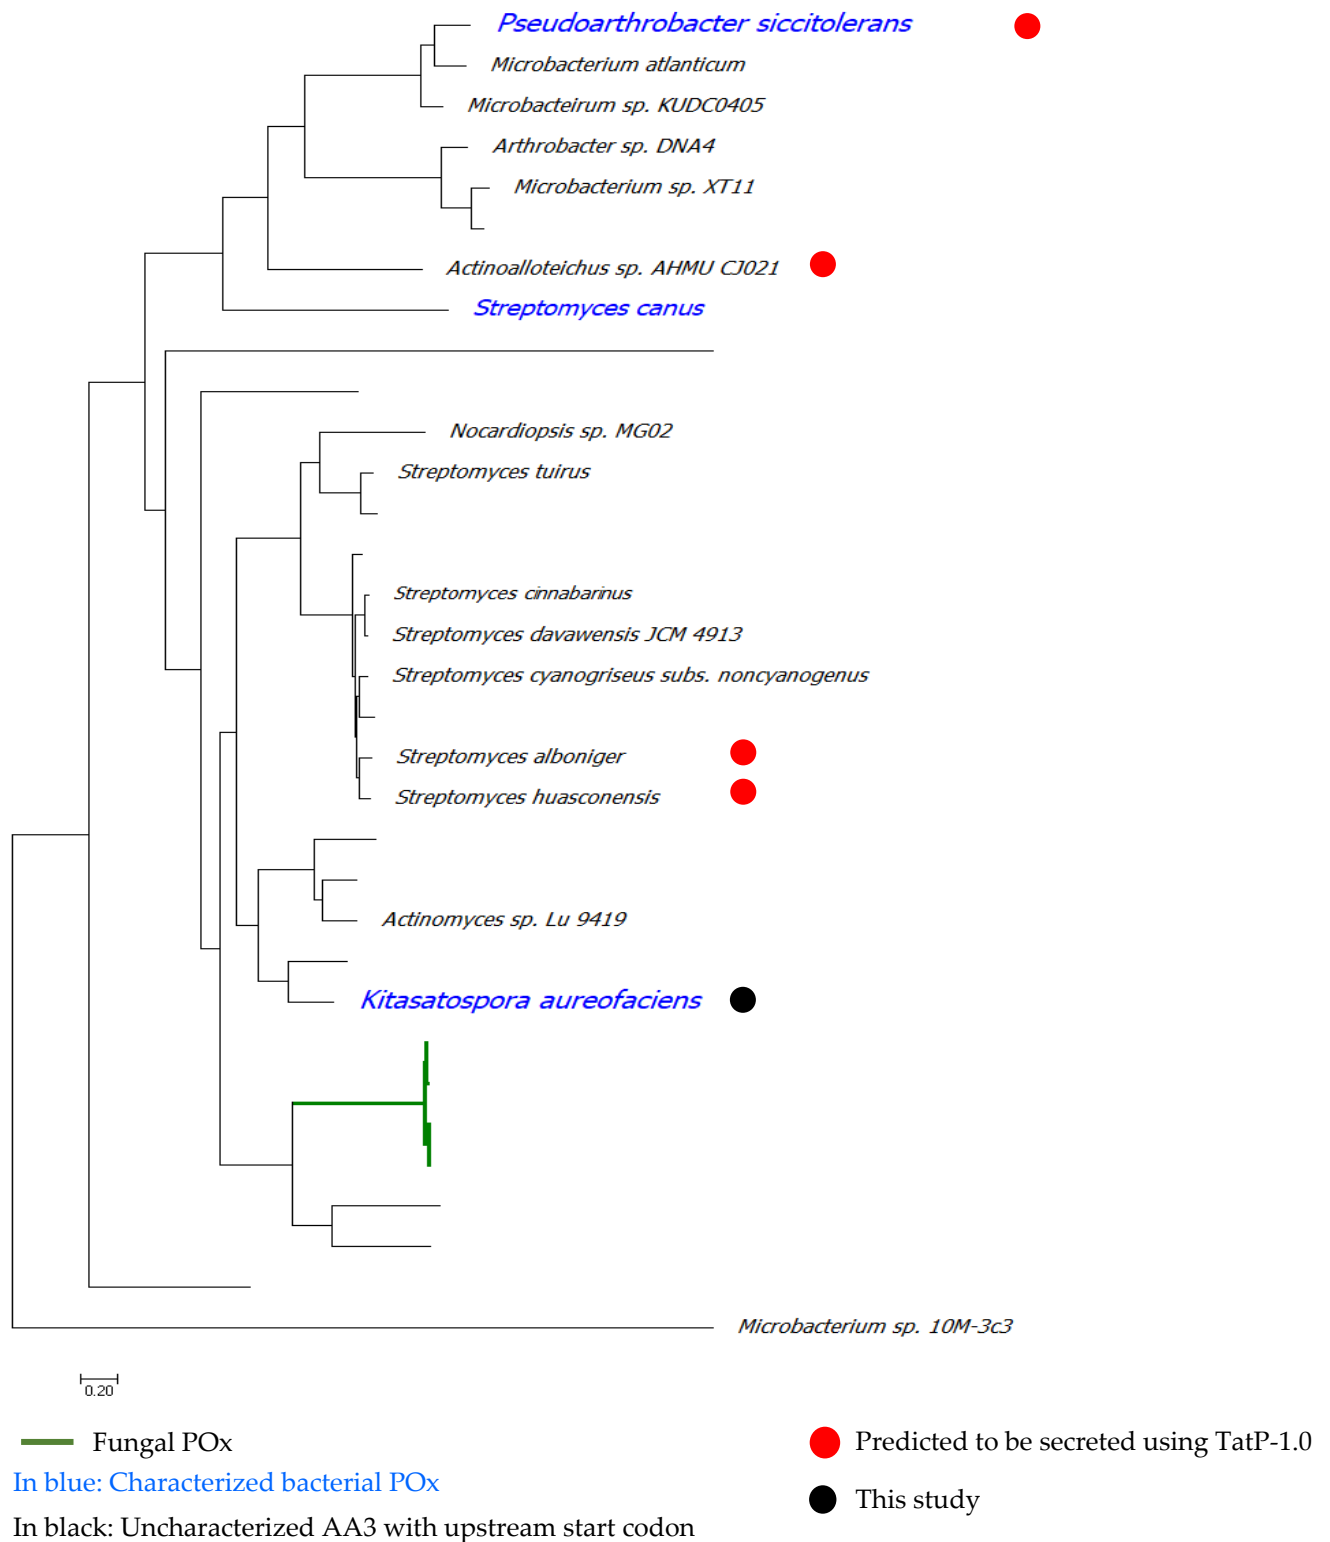

Figure S4. Phylogenetic tree constructed from extant bacterial POx-like sequences with *KaPOx* as query. Multiple alignment was conducted using Mafft (<https://mafft.cbrc.jp/>) with iterative refinement method for < 200 sequence with global homology. Tree was constructed using NGPhylogeny (<https://ngphylogeny.fr/>) with TrimAl as alignment curation and PhyML for tree inference.

Table S1. Oligonucleotides used in this study

| Name          | Sequence (5' - 3')                                            | Note                                                                          |
|---------------|---------------------------------------------------------------|-------------------------------------------------------------------------------|
| pNZ_SPKaPOx_F | AACTGCAGAAATGGTTACATTGATAGCCCGTAGATCAAC                       | SPKaPOX to pNZ8901                                                            |
| pNZ_KaPOx_F   | AACTGCAGAAATGATTACTCGCTATACGGAC                               | KaPOX to pNZ8901                                                              |
| KaPOxHis_R    | CTCTCTAGATCAGTGATGATGATGATGGCTTCGGACAGCGAGCACCTC              | (SP)KaPOX to pNZ8901 / pUC19-P <sub>vsi</sub>                                 |
| Pvsi_F        | TTTTTTAAGCTTGGGGATGACCACCGCGGGAG                              | P <sub>vsi</sub> to pUC19                                                     |
| Pvsi_R        | TTTTTCATCTGCAGCTCTCCTTCGATCGATG                               | P <sub>vsi</sub> to pUC19                                                     |
| SPKaPOx_F     | GCTGCAGATGGTTACATTGATAGCCCG                                   | SPKaPOX to pUC19-P <sub>vsi</sub>                                             |
| KaPOx_F       | GAGAGCTGCAGATGATTACTCGCTATACGGACACC                           | KaPOX to pUC19-P <sub>vsi</sub>                                               |
| mRFP_GA_F     | CATCGATCGAAGGAGAGCTGCAGATGGCCTCCTCCGAGGACGTC                  | mRFP to pUC19-P <sub>vsi</sub> without SP <sup>Sec</sup> with Gibson Assembly |
| mRFP_GA_R     | AGCTCGGTACCCGGGGATCCGAGCTCTCTAGATTAGGCGCCGGTGGAGTGGCGGC       | mRFP to pUC19-P <sub>vsi</sub> without SP <sup>Sec</sup> with Gibson Assembly |
| SPKaPOx_GA_F  | CGATCGAAGGAGAGCTGCAGATGGTTACATTGATAGCCCGTAG                   | fusion SPKaPOx-mRFP-His in pUC19-P <sub>vsi</sub>                             |
| KaPOx_GA_F    | GCTTCGGACAGCGAGCACCTC                                         | fusion KaPOx-mRFP-His in pUC19-P <sub>vsi</sub>                               |
| KaPOx_GA_R    | CGGGGATCCGAGCTCTCTAGACCGCCGCTGCCGCCGCTTCGGACAGCGAGCACCTCG     | fusion (SP) KaPOx-linker in pUC19-P <sub>vsi</sub>                            |
| mRFP_F        | ATGGCCTCCTCCGAGGACGTCATCAAG                                   |                                                                               |
| mRFP_lkk_GA_F | AGCGGCGGCAGCGGCGGTATGGCCTCCTCCGAGGACGTC                       | fusion (SP) KaPOx-mRFP-His in pUC19-P <sub>vsi</sub>                          |
| mRFPHis_GA_R  | GGGGATCCGAGCTCTCTAGATCAGTGATGATGATGATGATGGGCGCCGGTGGAGTGGCGCC | fusion (SP) KaPOx-mRFP-His in pUC19-P <sub>vsi</sub>                          |
| eGFP_F        | AGAGCTGCAGATGGTGAGCAAGGGCGAGGAG                               | eGFP to pUC-P <sub>vsi</sub>                                                  |
| eGFP_R        | GAGCTCTCTAGATCATTACTTGTACAGCTCGTCATGCCGAGAGTGATCCC            | eGFP to pUC-P <sub>vsi</sub>                                                  |

|           |                                                                                |                                |
|-----------|--------------------------------------------------------------------------------|--------------------------------|
|           |                                                                                |                                |
| eGFP_GA_F | <i>CGAGTTGGGGGACTTTGCCGGTGAGCAAGGGCG</i><br><i>AGGAGCT</i>                     | SPeGFP to pUC-P <sub>vsi</sub> |
| eGFP_GA_R | <i>GGGGATCCGAGCTCTCTAGATTACTTGTACAGCT</i><br><i>CGTCCATGC</i>                  | SPeGFP to pUC-P <sub>vsi</sub> |
| eGFP_A    | <i>ATGTGTCAGCGGCGCCGAGTTGGGGGACTTTGC</i><br><i>CGATGGTGAGCAAGGGCGAGGAG</i>     | SPKaPOx to eGFP                |
| eGFP_B    | <i>TCACTTGGGCCCTCGGCGCCGCGAACGGCTCG</i><br><i>GTCCAGTGATGTGTCAGCGGCGCCGAGT</i> | SPKaPOx to eGFP                |
| eGFP_C    | <i>TCAACAATTTTGCACAGGTTCAACCGCACTCCA</i><br><i>TCACTTGGGCCCTCGGCGCCGCG</i>     | SPKaPOx to eGFP                |
| eGFP_D    | <i>GAGAGCTGCAGATGGTTACATTGATAGCCCGT</i><br><i>AGATCAACAATTTTGCACAGGTTTC</i>    | SPKaPOx to eGFP                |

Bold: linker

Underline: Restriction enzyme

Italic: complement
